# Supplementary material for: Photoremovable protecting groups as controlled-release device for sex pheromone
Source: Royal Society of Chemistry journal article supplement (doi:10.1039/c2pp25118c), 2012-10-12
Supplement: c2pp25118c.pdf [file c2pp25118c.pdf]

# Photoremovable protecting groups as controlled release device for pheromone

*Sanghamitra Atta,<sup>1</sup> Mohammed Iqbal,<sup>1</sup> Nishitha Boda,<sup>1</sup> Samiran S. Gauri<sup>2</sup> and N.D. Pradeep  
Singh<sup>1\*</sup>*

<sup>1</sup>Department of Chemistry, Indian Institute of Technology, Kharagpur-721302, India.

<sup>2</sup>Department of Biotechnology, Indian Institute of Technology, Kharagpur-721302, India.

\*Corresponding author: Phone: (+) 91-3222-282324; Fax: (+) 91-3222-282252

*E-mail:* [ndpradeep@chem.iitkgp.ernet.in](mailto:ndpradeep@chem.iitkgp.ernet.in)

| Content:                                                                                                                                                                       | Pages |
|--------------------------------------------------------------------------------------------------------------------------------------------------------------------------------|-------|
| (1) $^1\text{H}$ NMR and $^{13}\text{C}$ NMR spectra of caged compounds ( <b>3a-d</b> ) and pheromone Chloroformate <b>1a</b> .                                                | 3-7   |
| (2) $^1\text{H}$ NMR spectra of caged compound <b>3c</b> at regular intervals of UV ( $\geq 350$ nm) irradiation ( <b>Fig. S1</b> ).                                           | 8     |
| (3) Absorption spectra of caged compound <b>3d</b> in aqueous ethanol solution at regular intervals of irradiation by UV light ( $\geq 350$ nm) ( <b>Fig. S2</b> ).            | 9     |
| (4) Absorption (A) and emission (B) spectra of caged compound <b>3a</b> in aqueous ethanol solution at regular intervals under direct sunlight irradiation ( <b>Fig. S3</b> ). | 10    |
| (5) Absorption (A) and emission (B) spectra of caged compound <b>3c</b> in loam soil at regular intervals under direct sunlight irradiation ( <b>Fig. S4</b> ).                | 11    |

### (Z)-hexadec-11-enyl chloroformate

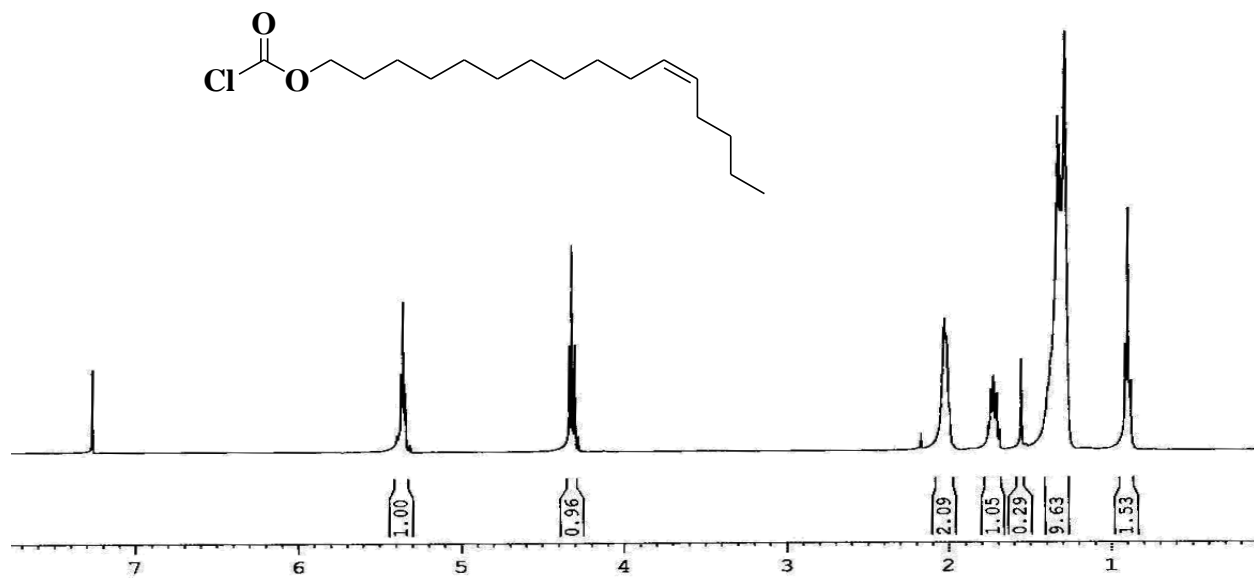

### (Z)-hexadec-11-enyl chloroformate

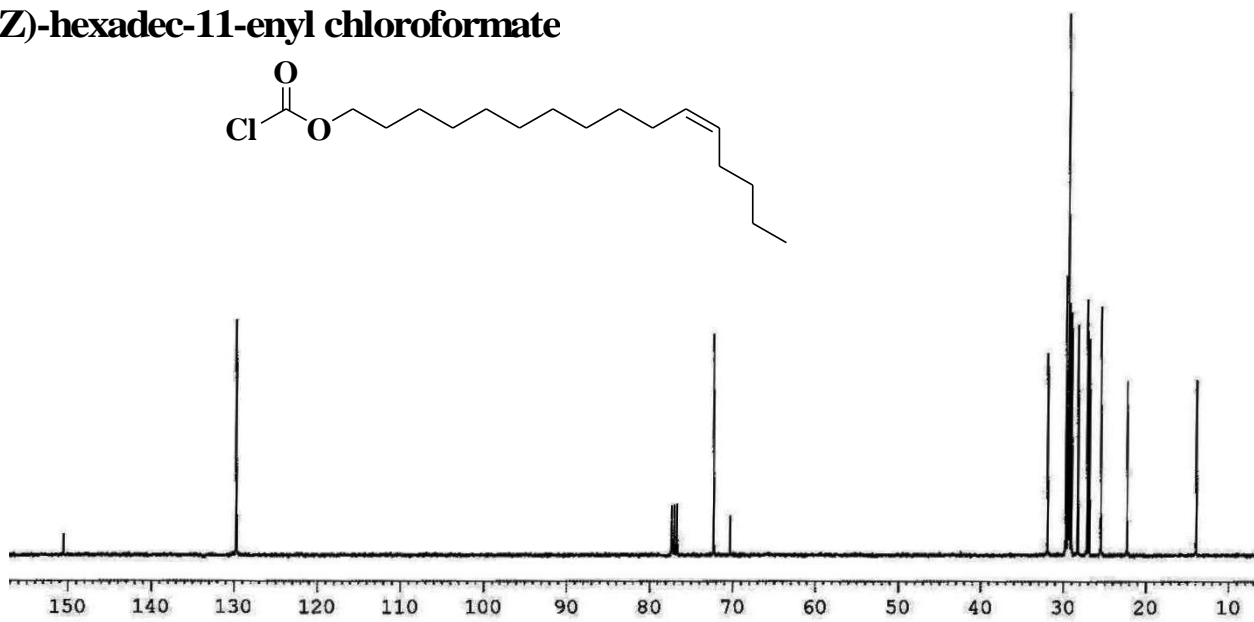

**3a. (Z)-hexadec-11-enyl (7-hydroxy-2-oxo-2H-chromen-4-yl) methyl carbonate:**

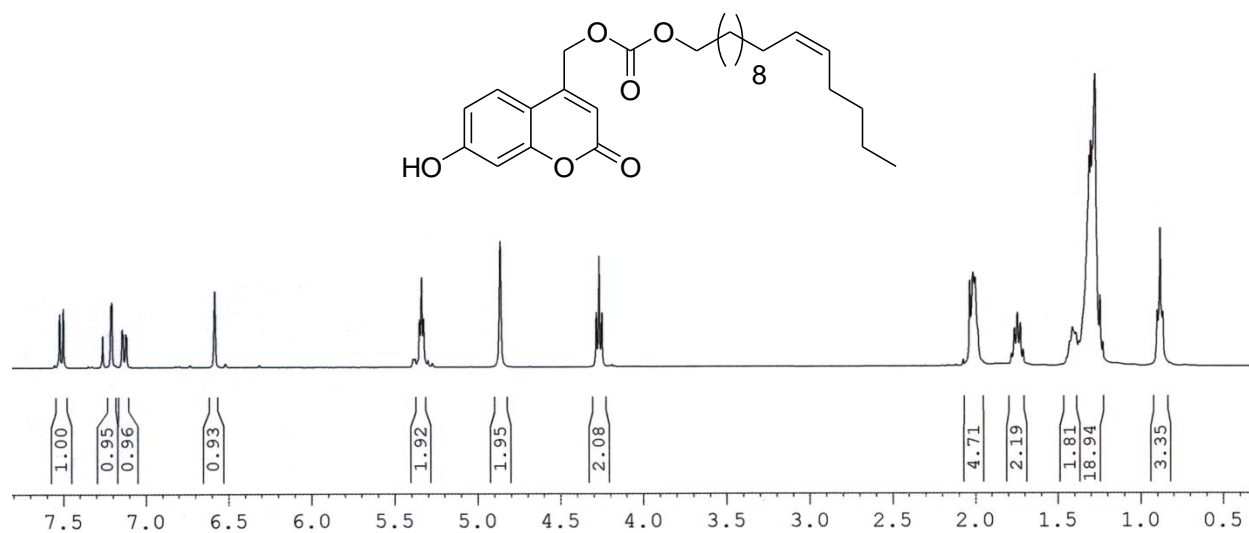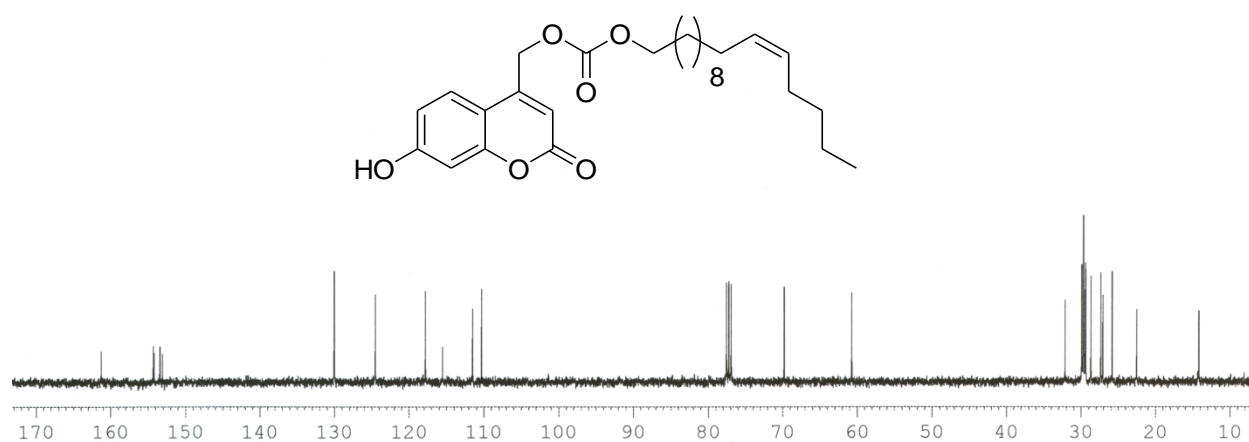

**3b. (Z)-hexadec-11-enyl (pyren-10-yl) methyl carbonate:**

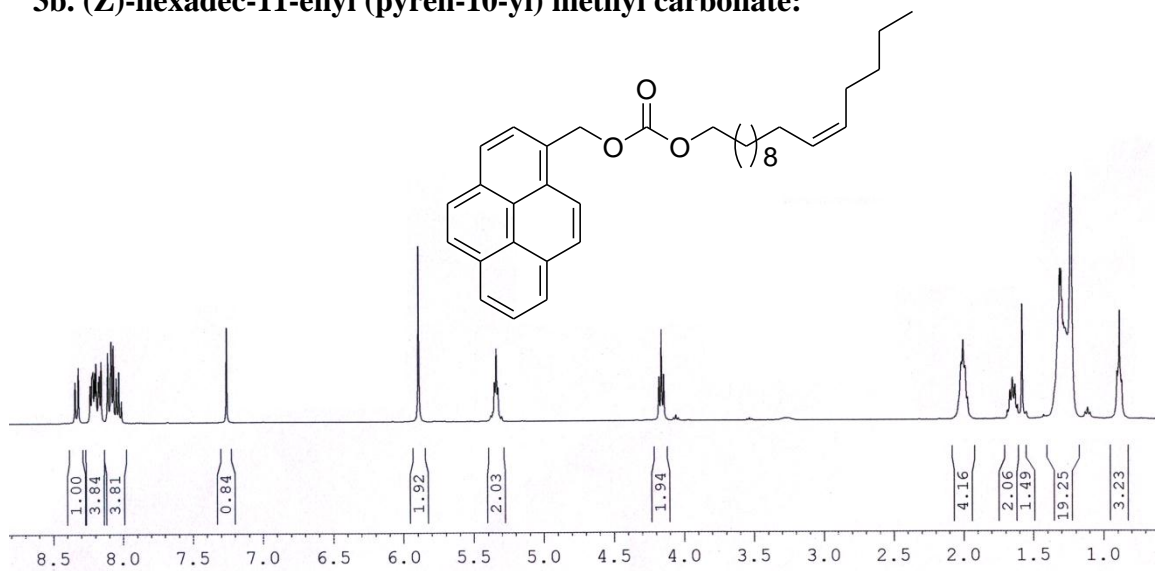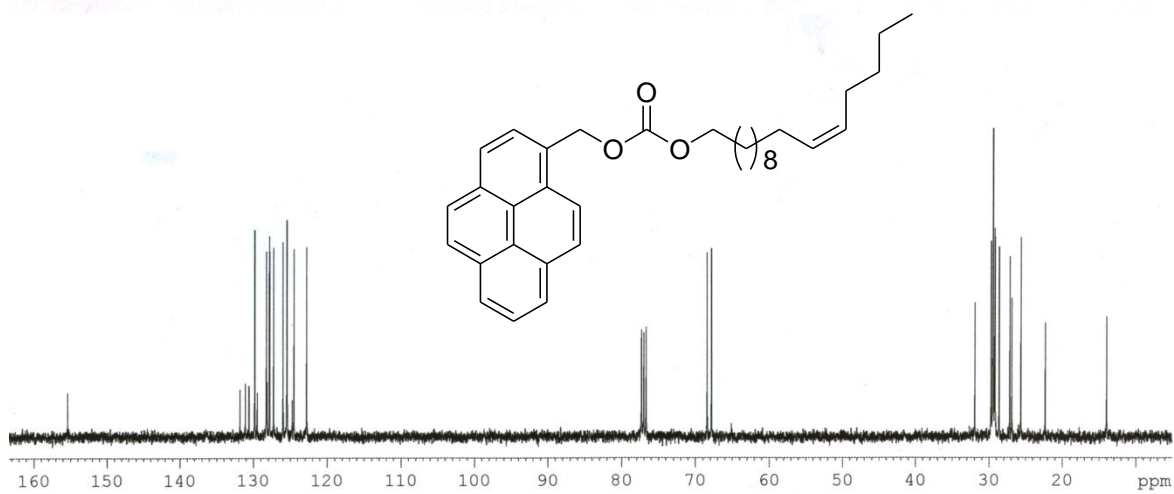

**3c. (anthracen-9-yl) methyl (Z)-hexadec-11-enyl carbonate:**

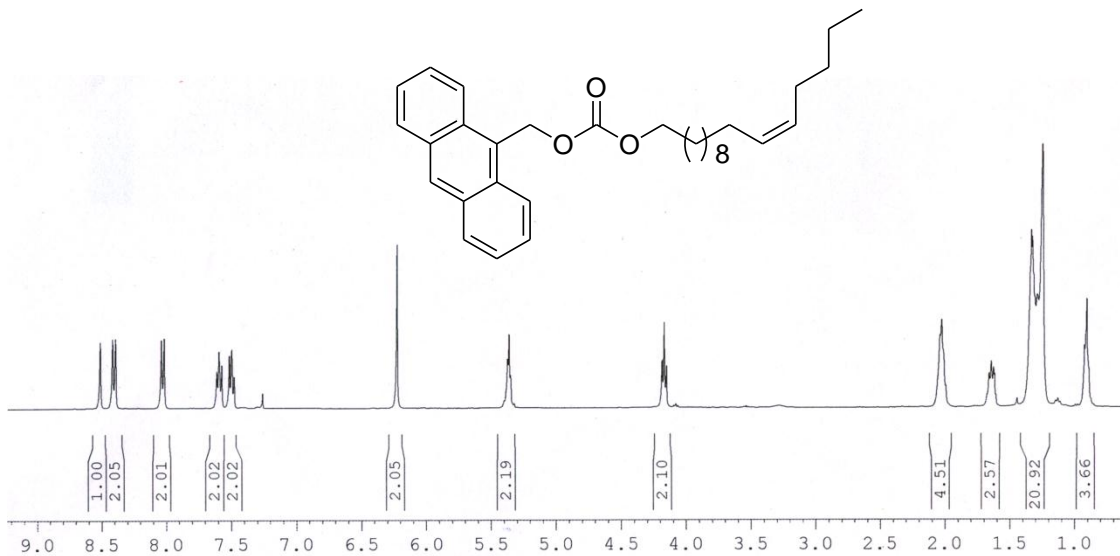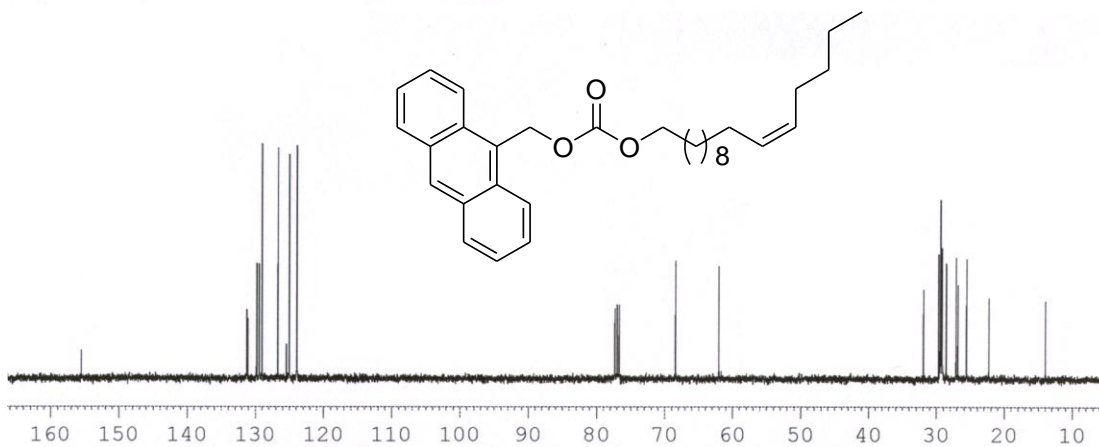

**3d. (Z)-hexadec-11-enyl (9, 10-dioxoanthracen-6-yl) methyl carbonate:**

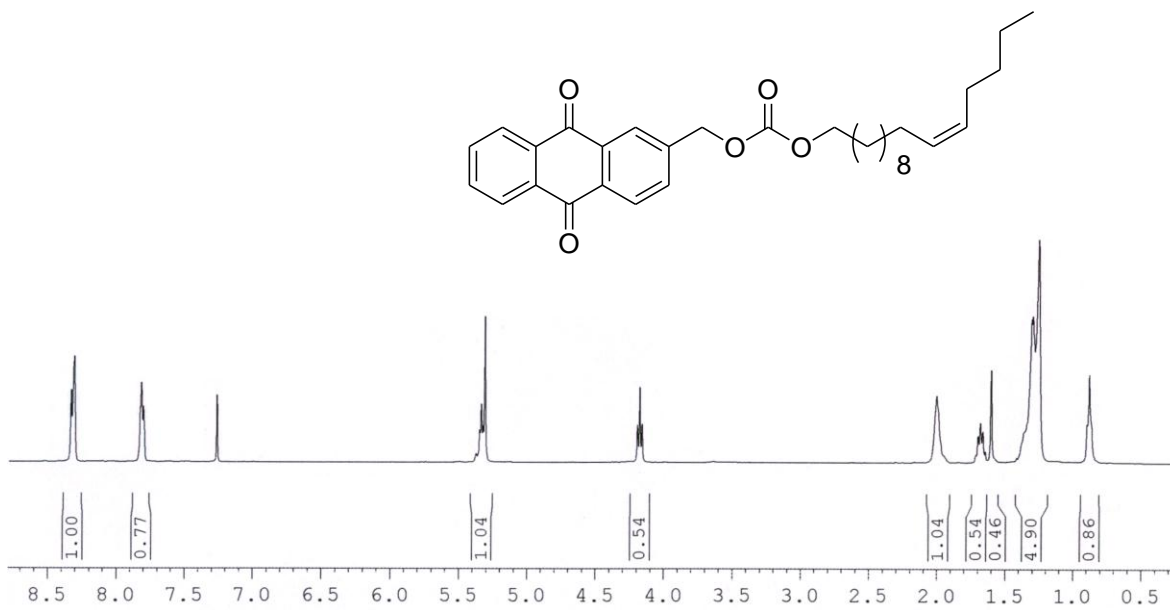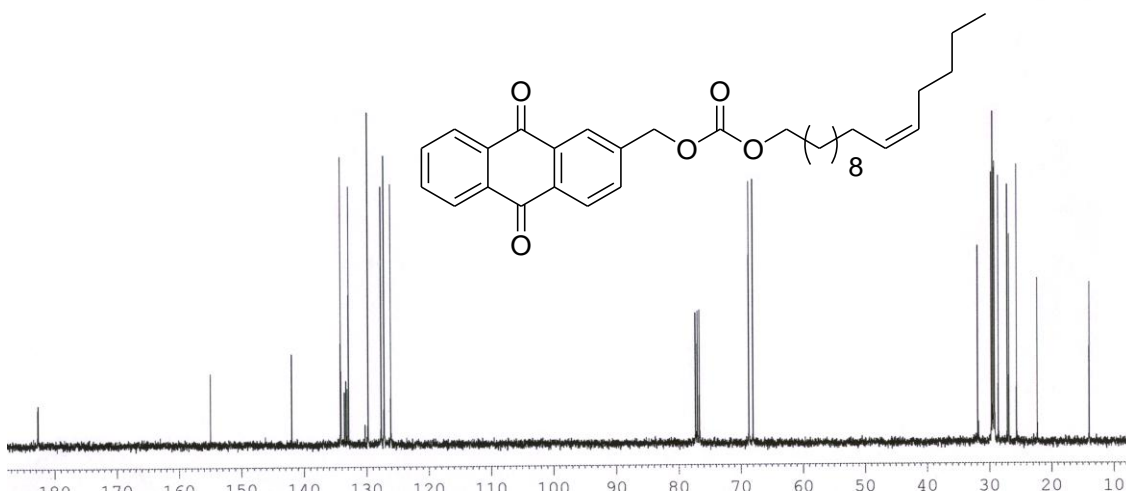

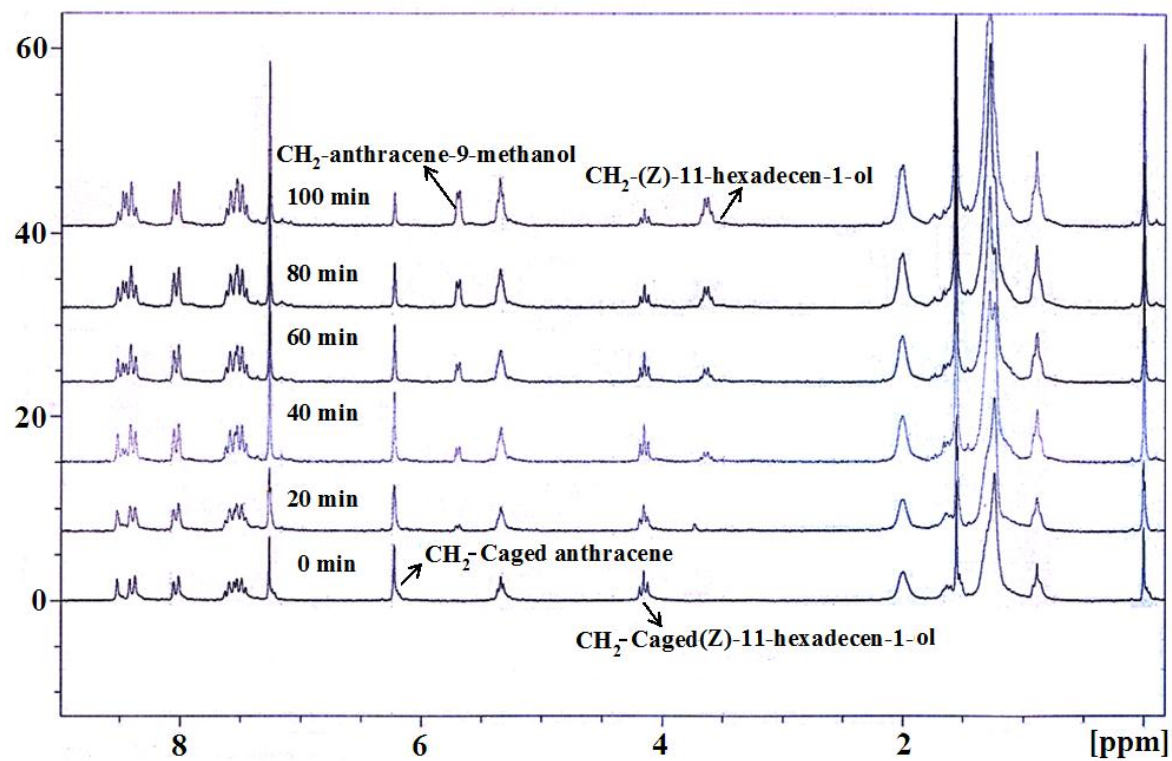

**Figure S1:** <sup>1</sup>H NMR spectra of caged compound **3c** at regular intervals of irradiation



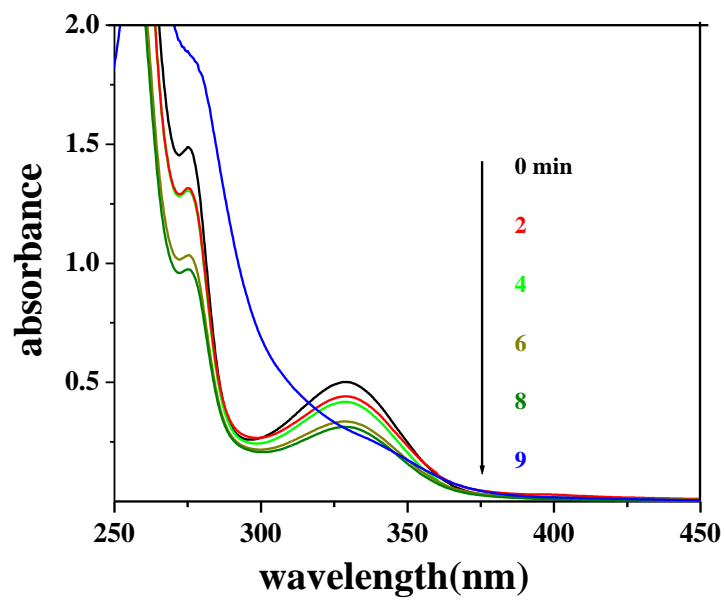

**Fig. S2:** Absorption spectra of caged compound **3d** in aqueous ethanolic solution at regular intervals of irradiation by UV light ( $\geq 350$ nm).

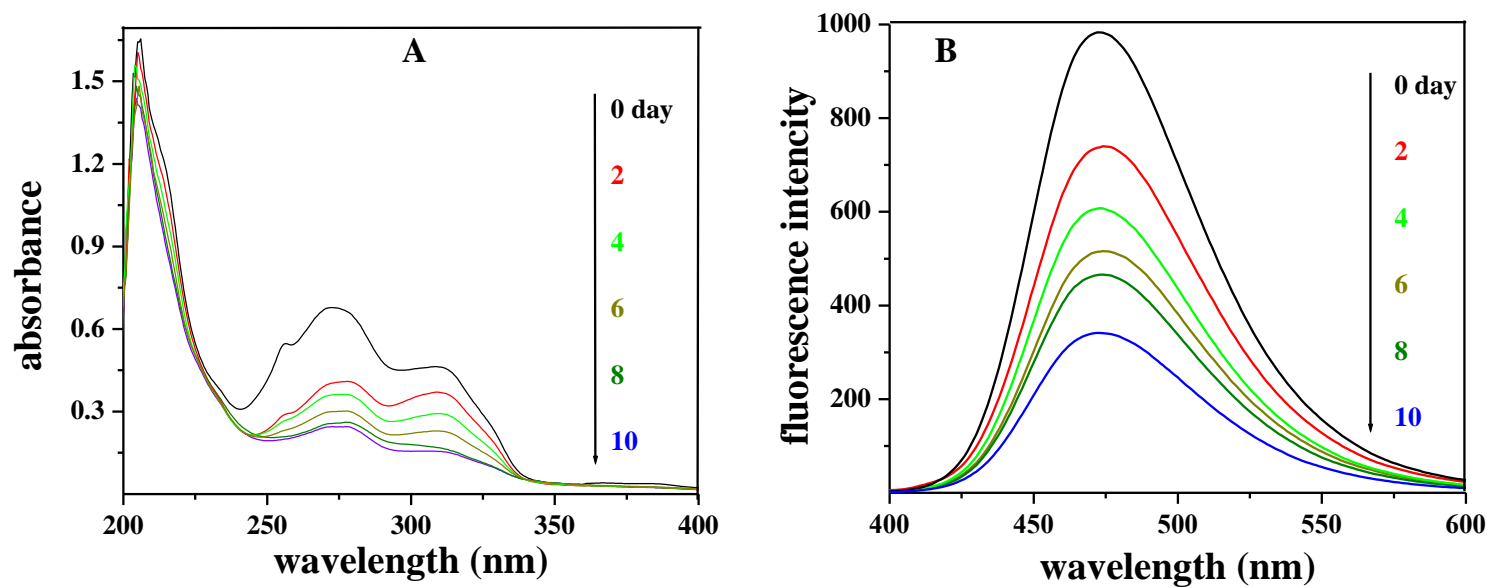

**Fig. S3:** Absorption (A) and emission (B) spectra of caged compound **3a** in aqueous ethanolic solution at regular intervals under direct sunlight irradiation.

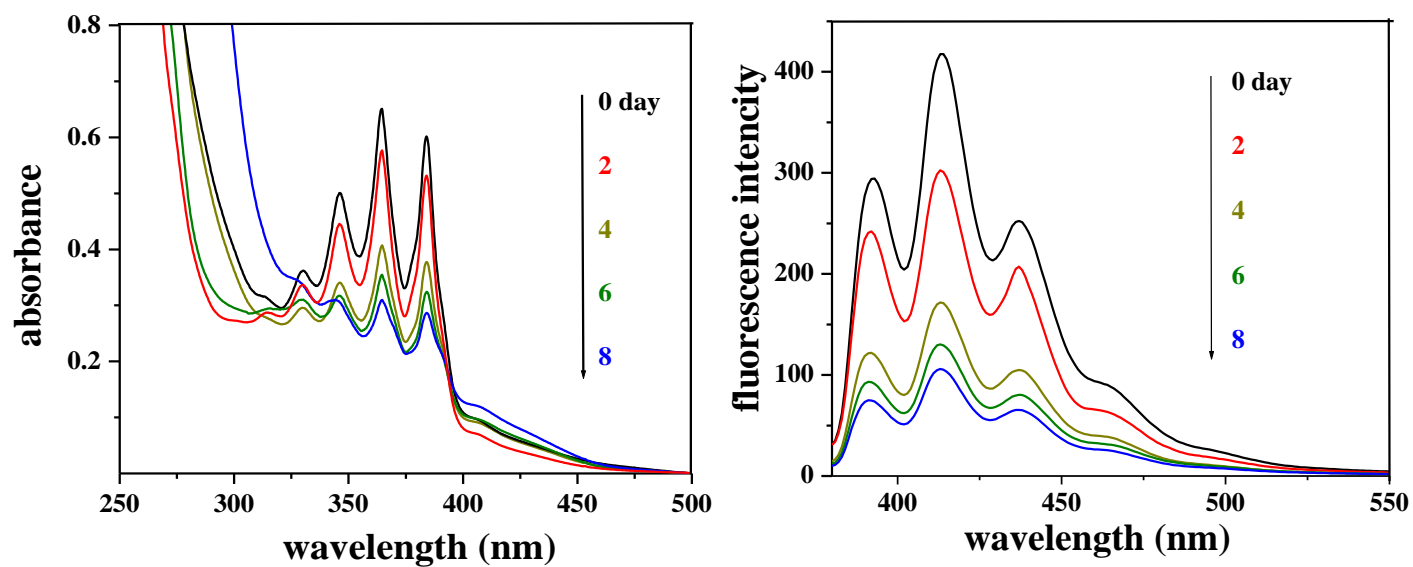

**Fig. S4:** Absorption (A) and emission (B) spectra of caged compound **3c** in loam soil at regular intervals under direct sunlight irradiation.
